# Supplementary material
Source: Springer Nature journal article supplement (https://www.springermedizin.de/resource/supplementary/12889_2006_440_MOESM1_ESM.pdf/9500884)

**Visit 1**

**Visit 2**

**Visit 3**

**Visit 4**

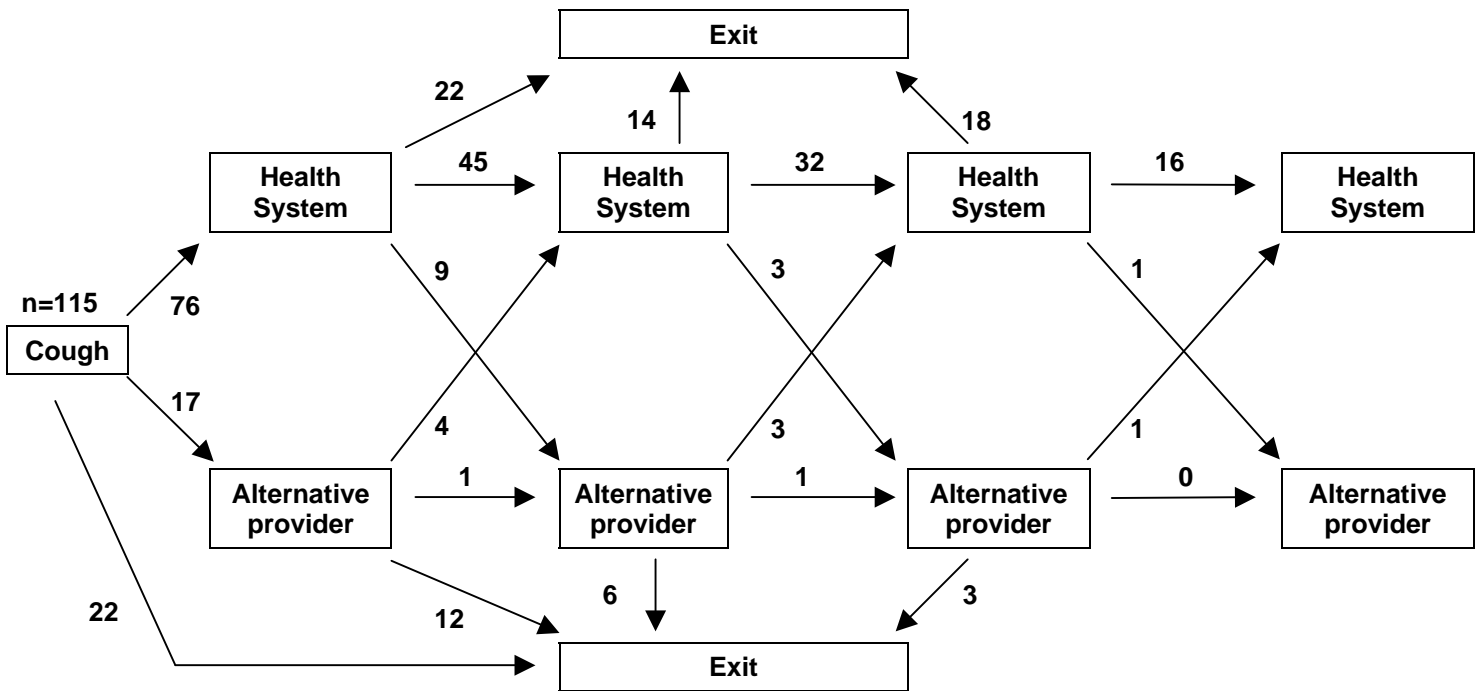

Supplement: MOESM1 [file 9500884]
